# Supplementary material for: Performance evaluation of virus concentration methods for implementing SARS-CoV-2 wastewater based epidemiology emphasizing quick data turnaround
Source: bioRxiv or medRxiv preprint supplement (doi:10.1101/2021.05.29.21257950), 2021-09-24
Supplement: Supplementary file [file media-1.pdf]

**Performance evaluation of virus concentration methods for implementing SARS-CoV-2 wastewater-based epidemiology, emphasizing quick data turnaround.**

Md Ariful Islam Juel<sup>1,4</sup>, Nicholas Stark<sup>2</sup>, Bridgette Nicolosi<sup>2</sup>, Jordan Lontai<sup>2</sup>, Kevin Lambirth<sup>2</sup>, Jessica Schlueter<sup>2,3</sup>, Cynthia Gibas<sup>2,3</sup>, Mariya Munir<sup>1,3</sup>

Department of Civil and Environmental Engineering<sup>1</sup>, Department of Bioinformatics and Genomics<sup>2</sup>, Bioinformatics Research Center<sup>3</sup>, 9201 University City Blvd, Charlotte, NC, 28223.

Department of Leather Engineering<sup>4</sup>, Khulna University of Engineering and Technology, Khulna, 9203.

**Supplementary Table S1:** Comparison between two concentration method. In this analysis, 40 mL wastewater was filtered using EMF and 125 to 150 mL processed with the Cp Select Concentrator. The AVL lysis buffer was not added to the concentrated sample from the Cp Select protocol.

| Sample name | Sampling date | EMF      |         |                 | Cp Select |         |                 |
|-------------|---------------|----------|---------|-----------------|-----------|---------|-----------------|
|             |               | Cq       | Mean Cq | Copies/L        | Cq        | Mean Cq | Copies/L        |
| Sample A1   | 10.16.20      | ND       | 35.82   | <b>1.46E+04</b> | ND        | 34.87   | <b>2.31E+03</b> |
|             |               | 35.74    |         |                 | 35.25     |         |                 |
|             |               | 35.9     |         |                 | 34.48     |         |                 |
| Sample B1   | 10.16.20      | 35.65    | 35.80   | <b>1.48E+04</b> | ND        | 34.85   | <b>2.31E+03</b> |
|             |               | 35.79    |         |                 | 36.23     |         |                 |
|             |               | 35.95    |         |                 | ND        |         |                 |
| Sample A2   | 10.14.20      | ND       | 35.16   | <b>2.35E+04</b> | 35.15     | 34.85   | <b>2.31E+03</b> |
|             |               | 34.89    |         |                 | 34.81     |         |                 |
|             |               | 35.42    |         |                 | 34.59     |         |                 |
| Sample B2   | 10.14.20      | Negative | 35.9    | <b>3.31E+04</b> | Negative  | 38.44*  | <b>1.14E+03</b> |
|             |               | 34.42    |         |                 | 38.40     |         |                 |
| Sample A3   | 10.12.20      | 36.77    | 35.9    | <b>3.31E+04</b> | ND        | 38.44*  | <b>1.14E+03</b> |
|             |               | 36.51    |         |                 | 38.48     |         |                 |
| Sample B3   | 10.12.20      | Negative |         |                 | Negative  |         |                 |
| Sample C    | 10.16.20      | Negative |         |                 | Negative  |         |                 |
| Sample D    | 10.16.20      | Negative |         |                 | Negative  |         |                 |
| Sample E    | 10.16.20      | ND       |         |                 | Negative  |         |                 |
|             |               | ND       |         |                 | Negative  |         |                 |
|             |               | 36.22    |         |                 | Negative  |         |                 |
| Sample F    | 10.16.20      | Negative |         |                 | Negative  |         |                 |

\* 50 ml wastewater was concentrated to 250 uL in the concentrator. Red Color indicates out of the LoD

**Supplementary Table S2:** The effect of addition of lysis buffer to the concentrated eluted sample from the Cp Select.

| Sample ID | With of AVL Lysis buffer |        |        |              | Without AVL lysis buffer |        |        |              |
|-----------|--------------------------|--------|--------|--------------|--------------------------|--------|--------|--------------|
|           | Rep.#1                   | Rep.#2 | Rep.#3 | Mean Cq      | Rep.#1                   | Rep.#2 | Rep.#3 | Mean Cq      |
| Sample a  | ND                       | ND     | ND     | -            | ND                       | 40.24  | 36.65  | <b>38.45</b> |
| Sample b  | 35.47                    | 37.39  | 36.31  | <b>36.39</b> | ND                       | ND     | 36.36  | -            |
| Sample c  | 32.87                    | 32.58  | 33.39  | <b>32.95</b> | ND                       | 39.19  | ND     | -            |

Red Color indicates out of LoD.

**Supplementary Table S3:** Effect of sample volume size on the performance of EMF and Cp Select concentrator in terms of SARS-CoV-2 quantification.

| I.D. | EMF filtration (40 mL) |         |          |              |             | Cp Select (40 mL) |         |          |              |             |
|------|------------------------|---------|----------|--------------|-------------|-------------------|---------|----------|--------------|-------------|
|      | Cq Value               |         |          |              |             | Cq Value          |         |          |              |             |
|      | Rep. #1                | Rep. #2 | Repl. #3 | Mean Cq      | SD          | Rep. #1           | Rep. #2 | Repl. #3 | Mean Cq      | SD          |
| S1   | -                      | -       | -        | -            | -           | -                 | -       | -        | -            | -           |
| S2   | -                      | -       | -        | -            | -           | 36.14             | -       | -        | -            | -           |
| S3   | -                      | -       | -        | -            | -           | -                 | -       | -        | -            | -           |
| S4   | 31.13                  | 31.16   | 31.12    | <b>31.14</b> | <b>0.02</b> | 31.67             | 32.41   | 32.78    | <b>32.28</b> | <b>0.56</b> |
| S5   | -                      | -       | -        | -            | -           | 39.10             | 37.04   | -        | <b>38.07</b> | <b>1.45</b> |
| S6   | -                      | -       | -        | -            | -           | -                 | -       | -        | -            | -           |
| S7   | 34.60                  | -       | 35.40    | <b>35</b>    | <b>0.57</b> | 32.90             | 33.15   | 33.54    | <b>33.2</b>  | <b>0.32</b> |
| S8   | -                      | -       | -        | -            | -           | 37.09             | -       | -        | -            | -           |
| S9   | 36.62                  | -       | 36.02    | <b>36.32</b> | <b>0.42</b> | 33.22             | 33.14   | 34.05    | <b>33.47</b> | <b>0.50</b> |
| S10  | 37                     | -       | -        | -            | -           | 37.46             | -       | -        | -            | -           |

| I.D. | EMF filtration (60 mL) |         |          |              |             | Cp Select (40 mL) |         |          |              |             |
|------|------------------------|---------|----------|--------------|-------------|-------------------|---------|----------|--------------|-------------|
|      | Cq Value               |         |          |              |             | Cq Value          |         |          |              |             |
|      | Rep. #1                | Rep. #2 | Repl. #3 | Mean Cq      | SD          | Rep. #1           | Rep. #2 | Repl. #3 | Mean Cq      | SD          |
| S1   | -                      | -       | -        | -            | -           | -                 | -       | -        | -            | -           |
| S2   | -                      | -       | -        | -            | -           | 37.12             | -       | -        | -            | -           |
| S3   | -                      | -       | -        | -            | -           | -                 | -       | -        | -            | -           |
| S4   | -                      | -       | -        | -            | -           | 32.42             | 32.61   | 32.63    | <b>32.55</b> | <b>0.11</b> |
| S5   | 36.31                  | 41.24   | 41.24    | <b>39.60</b> | <b>2.85</b> | 34.70             | 35.02   | 35.54    | <b>35.08</b> | <b>0.42</b> |
| S6   | -                      | -       | -        | -            | -           | 37.23             | -       | -        | -            | -           |
| S7   | 34.60                  | ND      | 35.40    | <b>35</b>    | <b>0.57</b> | 31.75             | 32.35   | 31.90    | <b>32.00</b> | <b>0.31</b> |
| S8   | -                      | -       | -        | -            | -           | 37.33             | -       | 37.16    | <b>37.24</b> | <b>0.12</b> |
| S9   | 31.75                  | 31.17   | 31.66    | <b>31.53</b> | <b>0.31</b> | 32.97             | 32.80   | 33.60    | <b>33.12</b> | <b>0.42</b> |
| S10  | -                      | -       | -        | -            | -           | 37.04             | -       | -        | -            | -           |

| I.D. | EMF filtration (60 mL) |         |          |         |    | Cp Select (40 mL) |         |          |         |    |
|------|------------------------|---------|----------|---------|----|-------------------|---------|----------|---------|----|
|      | Cq Value               |         |          |         |    | Cq Value          |         |          |         |    |
|      | Rep. #1                | Rep. #2 | Repl. #3 | Mean Cq | SD | Rep. #1           | Rep. #2 | Repl. #3 | Mean Cq | SD |

|     |       |       |    |       |      |       |       |       |              |             |
|-----|-------|-------|----|-------|------|-------|-------|-------|--------------|-------------|
| S1  |       |       |    |       |      | -     | -     | -     | -            |             |
| S2  |       |       |    |       |      | -     | -     | -     | -            |             |
| S3  | -     | -     | -  |       |      | -     | -     | -     | -            |             |
| S4  |       |       |    |       |      | 32.53 | 33.06 | 32.71 | <b>32.77</b> | <b>0.27</b> |
| S5  | 38.48 | 34.00 | ND | 36.24 | 3.17 | 41.79 | 35.41 | -     | <b>38.60</b> | <b>4.51</b> |
| S6  | 38.89 | 42.44 | ND | 40.66 | 2.51 | -     | -     | -     | -            | -           |
| S7  |       |       |    |       |      | 37.26 | 37.87 | 36.40 | <b>37.18</b> | <b>0.73</b> |
| S8  |       |       |    |       |      | -     | -     | -     | -            | -           |
| S9  |       |       |    |       |      | 37.23 | 37.17 | 35.66 | <b>36.69</b> | <b>0.89</b> |
| S10 |       |       |    |       |      | -     | -     | 36.83 | -            | -           |

Grey color column indicates those samples did not pass through the EMF filter during processing.

(a)

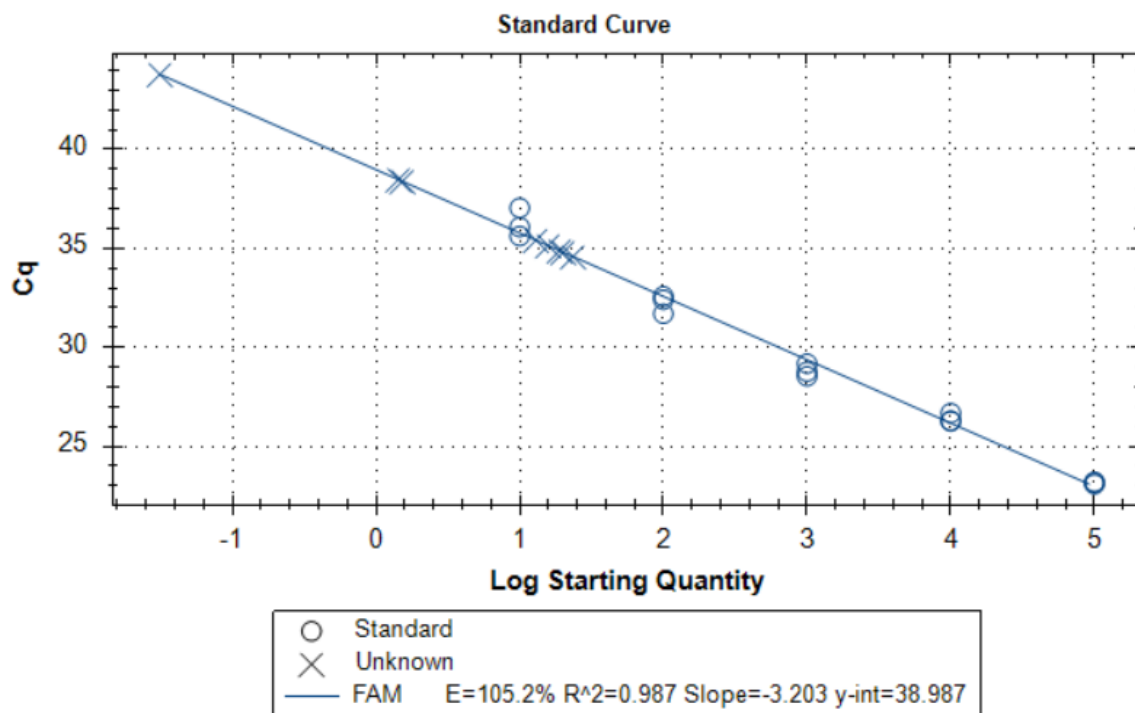

(b)

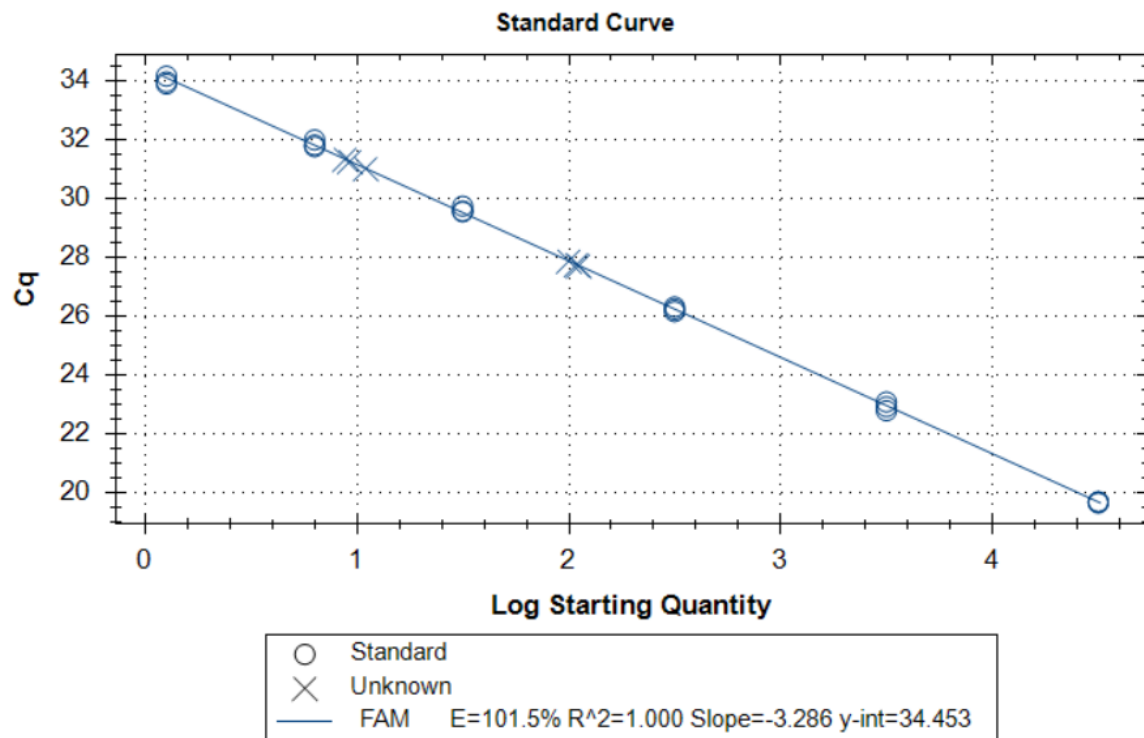

**Supplementary Figure S1:** Standard curve used in this study: (a) SARS-CoV-2 (N1) (b) BCoV

**Supplementary Table S4: Primers and probe sequences used in this study.**

| Assay  | Primer/Probe | Sequences                                 | References          |
|--------|--------------|-------------------------------------------|---------------------|
| CDC N1 | Forward      | GACCCCAAATCAGCGAAAT                       | Lu et al., 2020     |
|        | Reverse      | TCTGGTACTGCCAGTTGAATCTG                   |                     |
|        | Probe        | FAM-ACCCCGCAT/ZEN/TACGTTTGGTGGACC-3IABkFQ |                     |
| BCoV   | Forward      | CTGGAAGTTGGTGGAGTT                        | Decaro et al., 2008 |
|        | Reverse      | ATTATCGGCCTAACATACATC                     |                     |
|        | Probe        | FAM-CCTTCATATCTATACACATCAAGTTGTT-BHQ1     |                     |
